# Supplementary material
Source: PubMed Central journal article supplement (PMC10103150)
Supplement: NIHMS1868256-supplement-Supplement_Figure_1.pdf [file NIHMS1868256-supplement-Supplement_Figure_1.pdf]

## Supplemental Figure 1. Flow Cytometry Gating Strategy

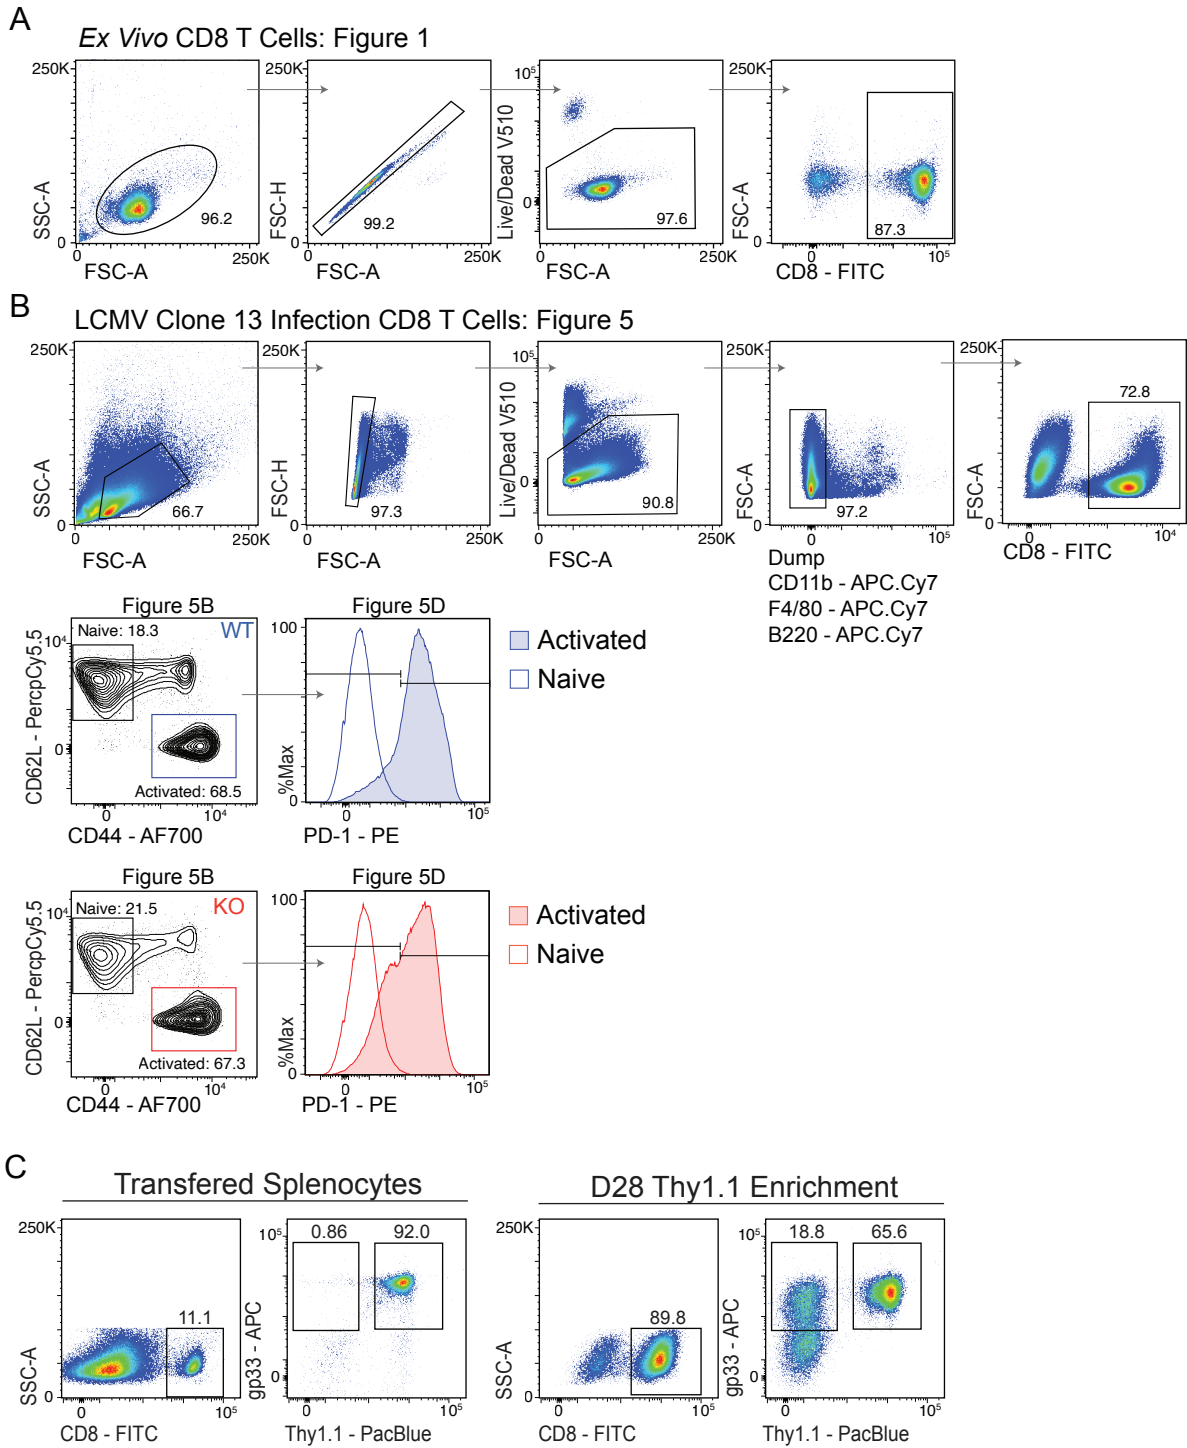

### Supplemental Figure 1. Flow Cytometry and Gating Strategies

Gating strategy by the indicated figure are shown for figures 1 (A) and 5 (B). Panel C shows transferred and recovered cells used in the analyses for figure 6.
