# Supplementary material
Source: PubMed Central journal article supplement (PMC10103150)
Supplement: NIHMS1868256-supplement-Supplement_Figure_2.pdf [file NIHMS1868256-supplement-Supplement_Figure_2.pdf]

## Supplemental Figure 2:

**A**

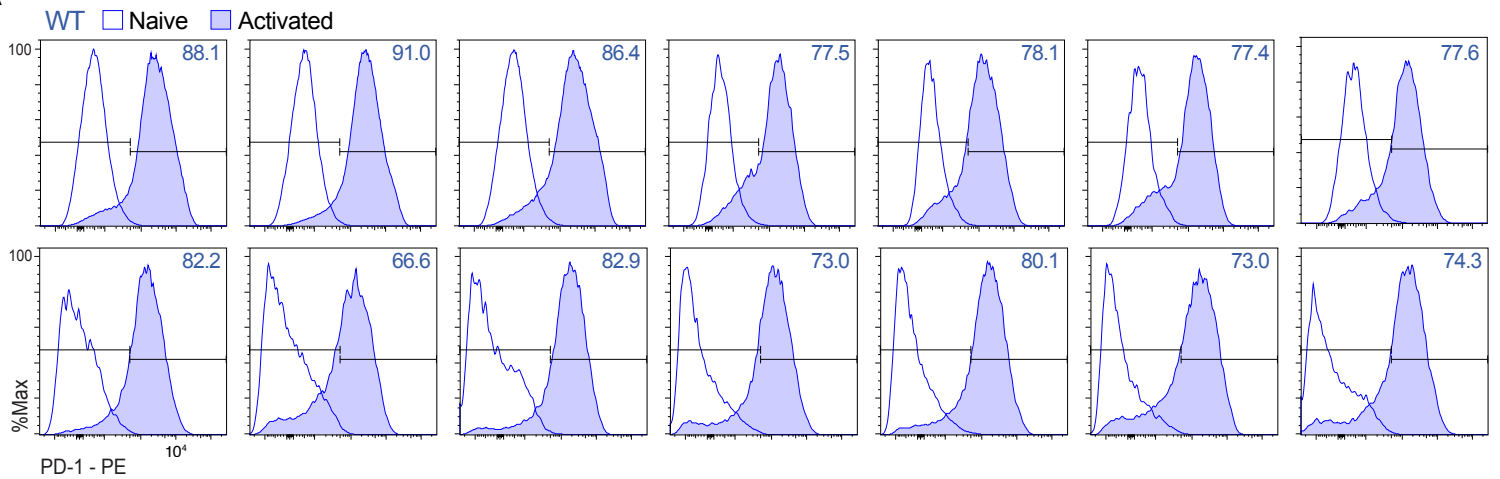

**B**

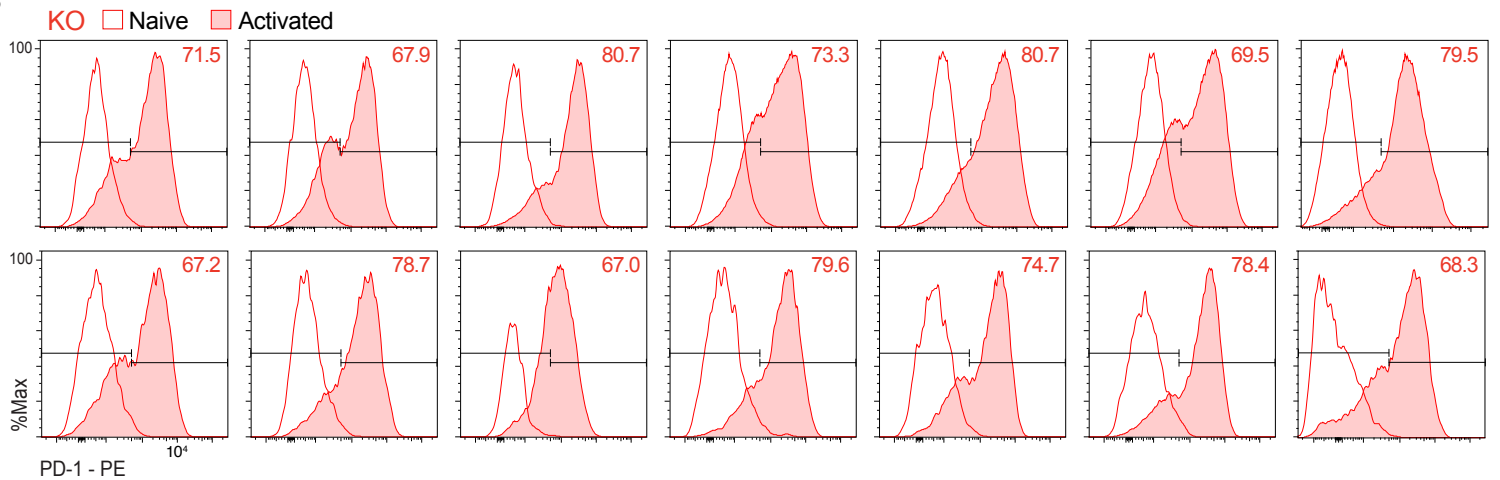

### Supplemental Figure 2. PD-1 expression on WT and STAT3 KO CD8 T cells

Individual data used to compose Figure 5D. Mice were infected with clone 13 LCMV. 8d post infection, splenocytes were isolated and analyzed for PD-1 expression by flow cytometry. Histograms for naïve (CD62L<sup>+</sup>CD44<sup>-</sup>) and activated (CD62L<sup>-</sup>CD44<sup>+</sup>) CD8 T cells from WT (A) and STAT3 KO (B) mice are shown.
