# Supplementary material
Source: PubMed Central journal article supplement (PMC10103150)
Supplement: NIHMS1868256-supplement-Supplement_Table.pdf [file NIHMS1868256-supplement-Supplement_Table.pdf]

Supplemental Table 1: Primers and Antibodies

| Assay               | Primer          | Sequence (5'-3')         |
|---------------------|-----------------|--------------------------|
| <b>qRT-PCR</b>      |                 |                          |
|                     | 18s F           | GTAACCCGTTGAACCCATT      |
|                     | 18s R           | CCATCCAATCGGTAGTAGCCG    |
|                     | Pdcd1 F         | CGTCCCTCAGTCAAGAGGAG     |
|                     | Pdcd1 R         | GTCCCTAGAAGTGCCCAACA     |
|                     | Stat3 KO seq F  | AGCGAGAGCAGCAAAGAAGG     |
|                     | Stat3 KO Seq R  | ATGTTGGTCGCATCCATGATC    |
|                     | Stat3 F (LCMV)  | AGGACATCAGTGCCAAGACC     |
|                     | Stat3 R (LCMV)  | CACTACCTGGGTCGGCTTC      |
|                     | Prdm1 F         | ATGGAGGACGCTGATATGAC     |
|                     | Prdm1 R         | CCTTACTTACCACGCCAATAAC   |
| <b>ChIP-qRT-PCR</b> |                 |                          |
|                     | Pdcd1 -3.7 F    | AGGGTGAGCAGGCCGAGAGCAA   |
|                     | Pdcd1 -3.7 R    | AGCACAGGGAAGAAGCTGTTGGG  |
|                     | Pdcd1 -2.7 F    | GGCCCTGCAGCCCAGGTAAC     |
|                     | Pdcd1 -2.7 R    | TCAAAGCAGGGCAGAACAGAGAGT |
|                     | Pdcd1 CRC F     | CCTCACCTCCTGCTTGCTCTC    |
|                     | Pdcd1 CRC R     | GTGAGACCCACACATCTCATTGC  |
|                     | Pdcd1 Blimp1 F  | GGACTGAGGAAAGTTGACTGG    |
|                     | Pdcd1 Blimp1 R  | CGTGGAGAGTGAAAGGACCTC    |
|                     | Pdcd1 CRB F     | GGCAGTGTGCCTTCAGTAGC     |
|                     | Pdcd1 CRB R     | CCACCTCTAGTTGCCTGTTCTC   |
|                     | Pdcd1 Control F | CAGAGGCCACTCTTGACTCC     |
|                     | Pdcd1 Control R | AAGGCTCCCTGGAGGAGATA     |
|                     | Pdcd1 +17.1 F   | GGAGGGGATAGGCGCTGGGT     |
|                     | Pdcd1 +17.1 R   | TCTGGGCCAAGCCATCCGGT     |
| <b>LCMV Titer</b>   |                 |                          |
|                     | LCMV Clone 13 F | GGAGGGGATAGGCGCTGGGT     |
|                     | LCMV Clone 13 R | TCTGGGCCAAGCCATCCGGT     |

| Assay                 | Epitope        | Clone      | Company                  | Catalog #   | Fluorescence |
|-----------------------|----------------|------------|--------------------------|-------------|--------------|
| <b>Flow Cytometry</b> |                |            |                          |             |              |
|                       | CD8            | 2.43       | Tonbo Biosciences        | 35-1886     | FITC         |
|                       | CD62lg         | MEL-14     | Biologend                | 104432      | Percp-Cy5.5  |
|                       | CD44           | IM7        | Biologend                | 103026      | AF700        |
|                       | PD1            | RMPI-30    | Biologend                | 109104      | PE           |
|                       | PD1            | RMPI-30    | Biologend                | 109119      | Percp-Cy5.5  |
|                       | IL6R $\alpha$  | D7715A7    | Biologend                | 115811      | APC          |
|                       | IL10R          | 1B1.3a     | Biologend                | 112705      | PE           |
|                       | CD11b (Dump)   | M1/70      | Biologend                | 101226      | APC-Cy7      |
|                       | B220 (Dump)    | RA3-6B2    | Tonbo Biosciences        | 25-0452     | APC-Cy7      |
|                       | F4/80 (Dump)   | BM8        | Biologend                | 123118      | APC-Cy7      |
|                       | Ghost Dye      |            | Tonbo Biosciences        | 13-0870     | v510         |
|                       | Thy 1.1        | OX-7       | Biologend                | 202522      | PacificBlue  |
|                       | gp33 Tetramer  | H-2D(b)    | NIH Tetramer Core        |             | APC          |
|                       | Rat IgG2b,k    | RTK4536    | Biologend                | 400611      | APC          |
|                       | Rat IgG1, k    | RTK2071    | Biologend                | 400407      | PE           |
|                       | Rat IgG2b,k    | RTK4530    | Biologend                | 400631      | Percp-Cy5.5  |
| <b>ChIP</b>           |                |            |                          |             |              |
|                       | P-STAT3 (Y705) | D3A7       | Cell Signaling           | 9145        |              |
|                       | NFATc1         | 7A6        | ThermoFisher             | MA3-024     |              |
|                       | Blimp-1        | Polyclonal | Rockland Immunochemicals | 600-401-B52 |              |
|                       | H3K9Ac         | Polyclonal | Millipore                | 07-352      |              |
|                       | H3K27Ac        | Polyclonal | Millipore                | 07-360      |              |
|                       | H3K4Me         | Polyclonal | Millipore                | 07-436      |              |
|                       | H3K27Me3       | Polyclonal | Millipore                | 07-473      |              |
|                       | H3K9Me3        | 6F12-H4    | Millipore                | 05-1242     |              |
|                       | P-STAT1 (Y701) | 58D6       | Cell Signaling           | 9167        |              |
|                       | P-STAT4 (Y693) | D2E4       | Cell Signaling           | 4134        |              |
|                       | P-STAT5 (Y694) | Polyclonal | Cell Signaling           | 9358        |              |
|                       | STAT6          | D3H4       | Cell Signaling           | 5397        |              |
|                       | Rabbit IgG     |            | Millipore                | 12-370      |              |
| <b>Western</b>        |                |            |                          |             |              |
|                       | P-STAT3        | D3A7       | Cell Signaling           | 9145        |              |
|                       | STAT3          | 79D7       | Cell Signaling           | 4904        |              |
|                       | $\beta$ -Actin | ACTBD11B7  | Santa Cruz               | sc-81178    |              |
